# Supplementary material
Source: publisher figshare collection journal article supplement (https://sage.figshare.com/ndownloader/files/20152553)
Supplement: Supplementary file 1 [file 20152553]

### **Code Book for Minority Interest Group Database**

mean\_dw1comm = Mean DW-NOMINATE score for committee

median\_dw1comm = Median DW-NOMINATE score for committee

polariz\_score = Polarization score for committee

numhearings = Number of committee hearings

markup\_othercommaction = Markup and/or hearing held

numofmarkups = Number of markup hearings

commaction = Markup hearing and other hearings

statecodecensus = State Code for the Census

districtcodecensus = Congressional District Code for Census

committeemembers = Number of committee members

democrats = Number Democrats on Committee

gop = Number of Republicans on Committee

blackcommmembers = Number of Black Committee Members

latinocommmembers = Number of Latino Committee Members

asiancommmembers = Number of Asian Committee Members

nativeamericancommmembers = Number of Native American Committee Members

minoritymembers = Number of Minority Committee Members

raceproportion = Racial and ethnic proportion of Committee Members

pcmindemdeleg = Proportion minority of the Democratic Party Delegation

blackcommchair = Black Committee Chair

latinocommchair = Latino Committee Chair

asiancommchair = Asian American Committee Chair

naacp\_lobby = NAACP Lobbied on Bill

nclr\_lobby = NCLR (UnidosUS) Lobbied on Bill

lccr\_lobby = LCCR Lobbied on Bill

uscc\_lobby = USCC Lobbied on Bill

maldef\_lobby = MALDEF Lobbied on Bill

maldef\_reports\_2007 = MALDEF Total Lobbying Reports Submitted in 2007

maldef\_reports\_2008 = MALDEF Total Lobbying Reports Submitted in 2008  
nul\_lobby = NUL Lobbied on Bill  
nul\_reports\_2007 = NUL Total Lobbying Reports Submitted in 2007  
nul\_reports\_2008 = NUL Total Lobbying Reports Submitted in 2008  
uscc\_reports\_2007 = USCC Total Lobbying Reports Submitted in 2007  
uscc\_reports\_2008 = USCC Total Lobbying Reports Submitted in 2008  
naacp\_reports\_2007 = NAACP Total Lobbying Reports Submitted in 2007  
naacp\_reports\_2008 = NAACP Total Lobbying Reports Submitted in 2008  
nclr\_reports\_2007 = NCLR (UnidosUS) Total Lobbying Reports Submitted in 2007  
nclr\_reports\_2008 = NCLR (UnidosUS) Total Lobbying Reports Submitted in 2008  
lccr\_reports\_2007 = LCCR Total Lobbying Reports Submitted in 2007  
lccr\_reports\_2008 = LCCR Total Lobbying Reports Submitted in 2008  
maldefreport\_1= MALDEF Total Lobbying Report Submitted 2009  
maldedreport\_2 = MALDEF Total Lobbying Report Submitted 2010  
nulreport\_1 = NUL Total Lobbying Reports Submitted in 2009  
nulreport\_2 = NUL Total Lobbying Reports Submitted in 2010  
usccreport\_1 = USCC Total Lobbying Reports Submitted in 2009  
usccreport\_2 = USCC Total Lobbying Reports Submitted in 2010  
naacpreport\_1 = NAACP Total Lobbying Reports Submitted in 2009  
naacpreport\_2 = NAACP Total Lobbying Reports Submitted in 2010  
nclrreport\_1 = NCLR (UnidosUS) Total Lobbying Reports Submitted in 2009  
nclrreport\_2 = NCLR (UnidosUS) Total Lobbying Reports Submitted in 2010  
lccrreport\_1 = LCCR Total Lobbying Reports Submitted in 2009  
lccrreport\_2= LCCR Total Lobbying Reports Submitted in 2010  
naacp\_testify = NAACP Testified at committee hearing  
nclr\_testify = NCLR (UnidosUS) Testified at committee hearing  
lccr\_testify = LCCR Testified at committee hearing  
lastname  
firstname

sponsorlatino = Latino bill sponsor  
sponsorblack = Black bill sponsor  
sponsornativeamer = Native American bill sponsor  
sponsorasianpi = Asian American Pacific Islander Bill Sponsor  
minspnongender = Minority female sponsor  
dwnom1 = DW Nominate Dimension 1 for legislators  
dwnom2 = DW Nominate Dimension 2 for legislators  
ch\_senior = Chamber seniority  
committeemember = Number of committee members  
seniorpartymember = Senior Party member  
committeeseniority = Seniority on committee  
committeeperiodofservice = Committee member time of service  
minoritychair = Racial or ethnic minority committee chair  
minoritysponsor = Racial or ethnic minority bill sponsor  
ch\_minspon = Chair and minority bill sponsor  
pctwomen = Percent women on committee  
femalechair = Female chair of the committee  
hjudiciary = House Judiciary  
crjurisdiction = Committees with civil rights jurisdiction  
minoritychairXminsponsor = Minority chair and minority bill sponsor  
propblackcomm = Proportion of blacks on the committee  
prolatinocomm = Proportion of Latinos on the committee  
markup = Markup hearing held

***Other Variables from Policy Agendas Project and Congressional Bills Project***

Refcomm

billid

billnum

billtype

byreq  
chamber  
commem  
cong  
cosponsor  
intrdate  
major  
minor  
passh  
pass  
plaw  
reporth  
reports  
title  
comc  
comr  
cumhserv  
cumsserv  
delegate  
district  
frstconh  
frstconsgender  
leadcham  
leadcomm  
leadsubc  
majority  
memberid  
icpsrid  
mref

namefirst

namefull

party

postal
